# Supplementary material for: Dynamic crosslinked poly(styrene-block-butadiene-block-styrene) via Diels–Alder chemistry: an ideal method to improve solvent resistance and mechanical properties without losing its thermal plastic behavior
Source: Royal Society of Chemistry journal article supplement (doi:10.1039/c5ra08719h), 2015-01-01
Supplement: c5ra08719h1.pdf [file c5ra08719h1.pdf]

## Supporting Information

Table S1 recipes for different samples of SBS-xFu

| Sample names | The weight of SBS(g) | The weight of furfuryl mercaptan(g) | The volume of toluene(mL) |
|--------------|----------------------|-------------------------------------|---------------------------|
| SBS-2Fu      | 2                    | 0.0595                              | 20                        |
| SBS-5Fu      | 2                    | 0.1480                              | 20                        |
| SBS-10Fu     | 2                    | 0.2960                              | 20                        |
| SBS-15Fu     | 2                    | 0.4440                              | 20                        |
| SBS-20Fu     | 2                    | 0.5920                              | 20                        |

Table S2 data of the elemental analysis for sample SBS-15Fu

| Sample name | theoretical value |      |      | experimental value |      |      |
|-------------|-------------------|------|------|--------------------|------|------|
|             | C%                | S%   | H%   | C%                 | S%   | H%   |
| SBS-15Fu    | 83.15             | 5.09 | 9.21 | 82.63              | 5.02 | 9.08 |

Table S2 recipes for different samples of SBS-xFu-M series

| Sample name | The weight of SBS(g) | The addition of furfuryl mercaptan(g) | The addition of bismaleimide (g) | The volume of toluene(mL) |
|-------------|----------------------|---------------------------------------|----------------------------------|---------------------------|
| SBS-2Fu-M   | 2                    | 0.0595                                | 0.0929                           | 20                        |
| SBS-5Fu-M   | 2                    | 0.1480                                | 0.2323                           | 20                        |
| SBS-10Fu-M  | 2                    | 0.2960                                | 0.4645                           | 20                        |
| SBS-15Fu-M  | 2                    | 0.4440                                | 0.6968                           | 20                        |
| SBS-20Fu-M  | 2                    | 0.5920                                | 0.9290                           | 20                        |

Table S3 recipes for different samples of SBS-15Fu-yM series

| Sample name  | The weight of PB(g) | The addition of furfuryl mercaptan(g) | The addition of bismaleimide (g) | The volume of toluene(mL) |
|--------------|---------------------|---------------------------------------|----------------------------------|---------------------------|
| SBS-15F-20M  | 2                   | 0.4440                                | 0.1394                           | 20                        |
| SBS-15F-40M  | 2                   | 0.4440                                | 0.2787                           | 20                        |
| SBS-15F-60M  | 2                   | 0.4440                                | 0.4184                           | 20                        |
| SBS-15F-80M  | 2                   | 0.4440                                | 0.5574                           | 20                        |
| SBS-15F-100M | 2                   | 0.4440                                | 0.6968                           | 20                        |

Table S4 data of gel fraction and swelling ratio

| Sample name  | SBS-2Fu-M | SBS-5Fu-M | SBS-10Fu-M | SBS-15Fu-M<br>(SBS-15F-100M) | SBS-20Fu-M | SBS-15F-20M | SBS-15F-40M | SBS-15F-60M | SBS-15F-80M |
|--------------|-----------|-----------|------------|------------------------------|------------|-------------|-------------|-------------|-------------|
| gel fraction | 65.3      | 69.3      | 72.2       | 78.5                         | 81.9       | 55.3        | 69.1        | 73.8        | 74.8        |

|                |      |      |      |      |      |      |      |      |      |
|----------------|------|------|------|------|------|------|------|------|------|
| swelling ratio | 21.9 | 18.2 | 15.8 | 13.6 | 13.4 | 22.5 | 17.6 | 15.6 | 14.7 |
|----------------|------|------|------|------|------|------|------|------|------|

Table S5 data of tensile-strain of SBS-xFu series

| Sample                                    | SBS    | SBS-2Fu | SBS-5Fu | SBS-10Fu | SBS-15Fu | SBS-20Fu |
|-------------------------------------------|--------|---------|---------|----------|----------|----------|
| tensile strength(MPa)                     | 1.86   | 12.86   | 16.62   | 15.39    | 7.14     | 3.26     |
| Ultimate strain (%)                       | 932.35 | 1079.66 | 1095.18 | 991.96   | 1127.56  | 1064.91  |
| Tensile stress at elongation of 300%(MPa) | 0.79   | 2.14    | 1.99    | 2.37     | 1.64     | 1.21     |
| Tensile stress at elongation of 500%(MPa) | 0.95   | 3.17    | 3.71    | 4.28     | 2.07     | 1.53     |
| Tensile stress at elongation of 700%(MPa) | 1.42   | 5.53    | 6.95    | 7.67     | 3.53     | 2.40     |

Table S6 data of tensile-strain of SBS-xFu-M series

| Sample                                    | SBS-2Fu-M | SBS-5Fu-M | SBS-10Fu-M | SBS-15Fu-M | SBS-20Fu-M |
|-------------------------------------------|-----------|-----------|------------|------------|------------|
| tensile strength(MPa)                     | 12.82     | 14.47     | 8.59       | 9.45       | 5.97       |
| Ultimate strain (%)                       | 777.52    | 706.35    | 679.74     | 751.99     | 344.17     |
| Tensile stress at elongation of 300%(MPa) | 4.30      | 6.00      | 6.65       | 6.66       | 6.05       |
| Tensile stress at elongation of 500%(MPa) | 6.04      | 8.33      | 7.39       | 7.04       | -----      |
| Tensile stress at elongation of 700%(MPa) | 9.91      | 14.14     | -----      | 8.45       | -----      |

Table S7 data of tensile-strain of SBS-15Fu-yM series

| Sample                                    | SBS-15Fu | SBS-15Fu-20M | SBS-15Fu-40M | SBS-15Fu-60M | SBS-15Fu-80M | SBS-15Fu-100M |
|-------------------------------------------|----------|--------------|--------------|--------------|--------------|---------------|
| tensile strength(MPa)                     | 7.14     | 10.07        | 12.02        | 11.54        | 14.96        | 9.45          |
| Ultimate strain (%)                       | 1127.56  | 914.54       | 922.54       | 933.89       | 843.21       | 751.99        |
| Tensile stress at elongation of 300%(MPa) | 1.64     | 2.76         | 3.67         | 4.60         | 6.68         | 6.66          |
| Tensile stress at elongation of 500%(MPa) | 2.07     | 4.25         | 5.43         | 6.37         | 8.67         | 7.04          |
| Tensile stress at elongation of 700%(MPa) | 3.53     | 6.49         | 7.70         | 8.46         | 11.08        | 8.45          |

Table S8 data tensile-strain of 3 generations of the remolded sample (SBS-15Fu-80M)

| The generation of the sample              | 0      | 1      | 2      | 3      |
|-------------------------------------------|--------|--------|--------|--------|
| tensile strength(MPa)                     | 14.96  | 14.10  | 12.71  | 12.03  |
| Ultimate strain (%)                       | 843.21 | 875.19 | 892.66 | 885.71 |
| Tensile stress at elongation of 300%(MPa) | 6.68   | 5.98   | 5.36   | 4.73   |
| Tensile stress at elongation of 500%(MPa) | 8.67   | 8.15   | 7.49   | 6.82   |

|                                           |       |       |      |      |
|-------------------------------------------|-------|-------|------|------|
| Tensile stress at elongation of 700%(MPa) | 11.08 | 10.48 | 9.68 | 9.08 |
|-------------------------------------------|-------|-------|------|------|

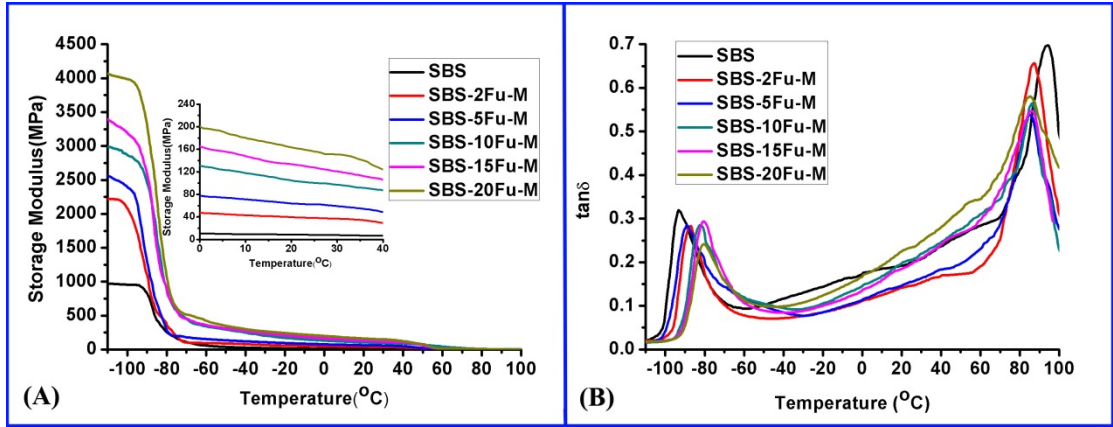

Figure S1 (A) storage modulus curves and (B)  $\tan\delta$  curves of the SBS-xFu-M series materials

Table S9 DMA data of the composites

| Sample name | T <sub>g1</sub> (°C) | peak tanδ1 | T <sub>g2</sub> (°C) | peak tanδ2 | Storage modulus at room temperature(MPa) |
|-------------|----------------------|------------|----------------------|------------|------------------------------------------|
| SBS         | -93.4                | 0.32       | 94.2                 | 0.69       | 8.1                                      |
| SBS-2Fu-M   | -87.2                | 0.28       | 87.1                 | 0.66       | 38.2                                     |
| SBS-5Fu-M   | -88.7                | 0.28       | 85.4                 | 0.54       | 62.3                                     |
| SBS-10Fu-M  | -82.2                | 0.28       | 85.9                 | 0.56       | 100.3                                    |
| SBS-15Fu-M  | -80.4                | 0.29       | 86.1                 | 0.55       | 128.0                                    |
| SBS-20Fu-M  | -80.4                | 0.24       | 85.4                 | 0.58       | 156.1                                    |

***Dynamic Thermomechanical properties for the crosslinked SBS based on DA reaction***

SBS -xFu-M series was selected as typical example for investigation. Shown in Figure S1 were the DMA (Dynamic Thermomechanical analysis) spectra for pure SBS and SBS-xFu-M series at a scanning rate of 5°C/min. Figure S1A plots the relationship between the storage modulus and temperature and Figure S1B shows  $\tan\delta$  curve for the materials with different branch ratio of furan groups with fixed RFM at 1:1. As shown in Figure S1B, the glassy region of SBS series material was found at temperature below about -8°C, in which the chain movement was frozen and

chains formed rigid network and the materials possessed high storage modulus. As the temperature increased, the storage modulus reduces gradually due to the liberation of chain's movement. As shown in Figure S1A, the storage modulus of SBS was improved substantially by the crosslinking caused by DA reaction between the furan groups on the SBS chains and bismaleimide in the range of scanned temperature. By comparison of the storage modulus at room temperature (Table S9), it was found that the storage modulus at room temperature was increased by increasing RF. For example, the storage modulus at room temperature could be improved from 8.1 MPa for the pure SBS to 156.1 MPa for the sample of SBS-20F-u-M, almost 20 times increased. The plot of  $\tan\delta$  was presented on Figure S1B and Table S9 summarized the data of  $T_g$  and its peak value. As shown in Figure S1B, it was illustrated that SBS and SBS-xFu-M series materials possessed two characteristic relaxation processes. One at low temperature (about  $-90\sim-80^\circ\text{C}$ ) belonged to the glass-transition temperature ( $T_g$ ) of PB block( $T_{g1}$ ) in the SBS. The other at about  $90^\circ\text{C}$  was related to  $T_g$  of PS( $T_{g2}$ ). With the introduction of RF, the position of  $T_{g1}$  moved toward higher temperature, while the position of  $T_{g2}$  was shifted toward lower temperature. The formation of covalent crosslinking via D-A reaction between bismaleimide and furan modified PB block of SBS resulted in restriction of the chains movement for PB domains. Therefore,  $T_{g1}$  moved towards high temperature. For the PS domains, the movement of  $T_{g2}$  could be explained with that the PS was plasticized by the PB phase. Therefore,  $T_{g2}$  was reduced by the introduction of the crosslinking caused by D-A reaction. The crosslinking caused by D-A reaction made the interaction between soft and hard domains strengthen. As shown in the AFM phases, for the SBS-xFu-M series material, the phases of the material changed with the branching ratio of furan groups. SBS-2Fu-M showed the lamellar structure with bright and dark phases interwinding together. Then, homogeneous structure was observed for SBS-5Fu-M. With further increasing RF up to 10 %, microphase separated structure appeared again and the PB domains had changed into dispersed phase. The AFM phases showed inner structure of the materials and the inner structure could explained that the PS

phase was plasticized by the PB phase and the effect enhanced with the increase of RF. Hence, the position of Tg<sub>2</sub> is shifted toward lower temperature and the more furan groups were branched, the more the position moved.
